# Supplementary material for: Understanding Soil Organic Carbon Dynamics in Integrated Crop-Pasture Systems: Insights into Deep Carbon
Source: Copernicus journal article supplement (doi:10.5194/egusphere-2025-6451), 2026-01-13
Supplement: Supplementary file 1 [file Supplementary material S1.xlsx]

## Sheet: model_results_Cstocks_14C
times	Pool	stock_C	Depth	C_14	k1_reduction	vertical_transfer	vertical_partition
2021	Labile	7.58896	0-20	16.2439	0	0	1
2021	Stable	53.4479	0-20	-65.5565	0	0	1
2021	Labile	1.53019	20-40	16.2439	0	0	1
2021	Stable	34.7188	20-40	-144.459	0	0	1
2021	Labile	0.75333	40-60	16.2439	0	0	1
2021	Stable	22.1432	40-60	-247.445	0	0	1
2021	Labile	0.630453	60-80	16.2439	0	0	1
2021	Stable	13.2913	60-80	-446.112	0	0	1
2021	Labile	7.58896	0-20	16.2439	0	0.1	1
2021	Stable	53.4479	0-20	-65.5565	0	0.1	1
2021	Labile	1.53019	20-40	16.2439	0	0.1	1
2021	Stable	35.097	20-40	-143.303	0	0.1	1
2021	Labile	0.75333	40-60	16.2439	0	0.1	1
2021	Stable	21.9494	40-60	-250.435	0	0.1	1
2021	Labile	0.630453	60-80	16.2439	0	0.1	1
2021	Stable	13.7155	60-80	-449.978	0	0.1	1
2021	Labile	7.58896	0-20	16.2433	0	0.1	0.7
2021	Stable	53.4479	0-20	-65.5566	0	0.1	0.7
2021	Labile	1.53365	20-40	16.0583	0	0.1	0.7
2021	Stable	34.9641	20-40	-147.454	0	0.1	0.7
2021	Labile	0.754539	40-60	15.9809	0	0.1	0.7
2021	Stable	22.0284	40-60	-247.859	0	0.1	0.7
2021	Labile	0.630859	60-80	16.0732	0	0.1	0.7
2021	Stable	13.7393	60-80	-444.506	0	0.1	0.7
2021	Labile	7.58896	0-20	16.243	0	0.1	0.5
2021	Stable	53.4479	0-20	-65.5564	0	0.1	0.5
2021	Labile	1.53595	20-40	15.9352	0	0.1	0.5
2021	Stable	34.8313	20-40	-147.727	0	0.1	0.5
2021	Labile	0.75527	40-60	15.8215	0	0.1	0.5
2021	Stable	21.8984	40-60	-245.341	0	0.1	0.5
2021	Labile	0.631109	60-80	15.971	0	0.1	0.5
2021	Stable	13.5163	60-80	-441.187	0	0.1	0.5
2021	Labile	7.58896	0-20	16.2439	0	0.2	1
2021	Stable	53.4479	0-20	-65.5565	0	0.2	1
2021	Labile	1.53019	20-40	16.2439	0	0.2	1
2021	Stable	34.8408	20-40	-142.977	0	0.2	1
2021	Labile	0.75333	40-60	16.2439	0	0.2	1
2021	Stable	22.0045	40-60	-247.665	0	0.2	1
2021	Labile	0.630453	60-80	16.2439	0	0.2	1
2021	Stable	13.6358	60-80	-447.776	0	0.2	1
2021	Labile	7.58896	0-20	16.244	0	0.2	0.7
2021	Stable	53.4479	0-20	-65.5565	0	0.2	0.7
2021	Labile	1.53711	20-40	15.8748	0	0.2	0.7
2021	Stable	34.8538	20-40	-145.33	0	0.2	0.7
2021	Labile	0.756061	40-60	15.6598	0	0.2	0.7
2021	Stable	21.9154	40-60	-244.895	0	0.2	0.7
2021	Labile	0.631403	60-80	15.8511	0	0.2	0.7
2021	Stable	13.5481	60-80	-449.01	0	0.2	0.7
2021	Labile	7.58896	0-20	16.2436	0	0.2	0.5
2021	Stable	53.4479	0-20	-65.5564	0	0.2	0.5
2021	Labile	1.54172	20-40	15.6301	0	0.2	0.5
2021	Stable	34.8547	20-40	-145.534	0	0.2	0.5
2021	Labile	0.757613	40-60	15.3279	0	0.2	0.5
2021	Stable	21.8553	40-60	-246.34	0	0.2	0.5
2021	Labile	0.631897	60-80	15.6433	0	0.2	0.5
2021	Stable	13.4995	60-80	-442.718	0	0.2	0.5
2021	Labile	7.58896	0-20	16.2439	0	0.3	1
2021	Stable	53.4479	0-20	-65.5565	0	0.3	1
2021	Labile	1.53019	20-40	16.2439	0	0.3	1
2021	Stable	34.7375	20-40	-145.634	0	0.3	1
2021	Labile	0.75333	40-60	16.2439	0	0.3	1
2021	Stable	22.0782	40-60	-249.764	0	0.3	1
2021	Labile	0.630453	60-80	16.2439	0	0.3	1
2021	Stable	13.6784	60-80	-428.79	0	0.3	1
2021	Labile	7.58896	0-20	16.2431	0	0.3	0.7
2021	Stable	53.4479	0-20	-65.5564	0	0.3	0.7
2021	Labile	1.54057	20-40	15.6906	0	0.3	0.7
2021	Stable	34.8633	20-40	-143.646	0	0.3	0.7
2021	Labile	0.757909	40-60	15.2761	0	0.3	0.7
2021	Stable	21.9258	40-60	-246.951	0	0.3	0.7
2021	Labile	0.63209	60-80	15.5612	0	0.3	0.7
2021	Stable	13.2991	60-80	-447.001	0	0.3	0.7
2021	Labile	7.58896	0-20	16.2438	0	0.3	0.5
2021	Stable	53.4479	0-20	-65.5564	0	0.3	0.5
2021	Labile	1.54749	20-40	15.3271	0	0.3	0.5
2021	Stable	34.7167	20-40	-144.604	0	0.3	0.5
2021	Labile	0.76029	40-60	14.7698	0	0.3	0.5
2021	Stable	22.0189	40-60	-245.018	0	0.3	0.5
2021	Labile	0.632889	60-80	15.238	0	0.3	0.5
2021	Stable	13.5264	60-80	-450.165	0	0.3	0.5
2021	Labile	7.58896	0-20	16.2443	0.005	0	1
2021	Stable	53.4479	0-20	-65.5564	0.005	0	1
2021	Labile	1.53019	20-40	16.8601	0.005	0	1
2021	Stable	34.7188	20-40	-144.478	0.005	0	1
2021	Labile	0.75333	40-60	17.6409	0.005	0	1
2021	Stable	22.1432	40-60	-247.482	0.005	0	1
2021	Labile	0.630453	60-80	18.6621	0.005	0	1
2021	Stable	13.2913	60-80	-446.155	0.005	0	1
2021	Labile	7.58896	0-20	16.2443	0.005	0.1	1
2021	Stable	53.4479	0-20	-65.5564	0.005	0.1	1
2021	Labile	1.53019	20-40	16.8601	0.005	0.1	1
2021	Stable	35.097	20-40	-143.318	0.005	0.1	1
2021	Labile	0.75333	40-60	17.6409	0.005	0.1	1
2021	Stable	21.9494	40-60	-250.464	0.005	0.1	1
2021	Labile	0.630453	60-80	18.6621	0.005	0.1	1
2021	Stable	13.7155	60-80	-450.014	0.005	0.1	1
2021	Labile	7.58896	0-20	16.243	0.005	0.1	0.7
2021	Stable	53.4479	0-20	-65.5565	0.005	0.1	0.7
2021	Labile	1.53403	20-40	16.6518	0.005	0.1	0.7
2021	Stable	34.9711	20-40	-147.482	0.005	0.1	0.7
2021	Labile	0.754841	40-60	17.3088	0.005	0.1	0.7
2021	Stable	22.0363	40-60	-247.925	0.005	0.1	0.7
2021	Labile	0.631034	60-80	18.4156	0.005	0.1	0.7
2021	Stable	13.7431	60-80	-444.57	0.005	0.1	0.7
2021	Labile	7.58896	0-20	16.2421	0.005	0.1	0.5
2021	Stable	53.4479	0-20	-65.5564	0.005	0.1	0.5
2021	Labile	1.53659	20-40	16.5135	0.005	0.1	0.5
2021	Stable	34.8437	20-40	-147.766	0.005	0.1	0.5
2021	Labile	0.755756	40-60	17.1075	0.005	0.1	0.5
2021	Stable	21.9116	40-60	-245.435	0.005	0.1	0.5
2021	Labile	0.631391	60-80	18.2679	0.005	0.1	0.5
2021	Stable	13.5223	60-80	-441.27	0.005	0.1	0.5
2021	Labile	7.58896	0-20	16.2443	0.005	0.2	1
2021	Stable	53.4479	0-20	-65.5564	0.005	0.2	1
2021	Labile	1.53019	20-40	16.8601	0.005	0.2	1
2021	Stable	34.8408	20-40	-142.988	0.005	0.2	1
2021	Labile	0.75333	40-60	17.6409	0.005	0.2	1
2021	Stable	22.0045	40-60	-247.687	0.005	0.2	1
2021	Labile	0.630453	60-80	18.6621	0.005	0.2	1
2021	Stable	13.6358	60-80	-447.8	0.005	0.2	1
2021	Labile	7.58896	0-20	16.2439	0.005	0.2	0.7
2021	Stable	53.4479	0-20	-65.5564	0.005	0.2	0.7
2021	Labile	1.53788	20-40	16.4465	0.005	0.2	0.7
2021	Stable	34.8651	20-40	-145.359	0.005	0.2	0.7
2021	Labile	0.756744	40-60	16.9039	0.005	0.2	0.7
2021	Stable	21.9301	40-60	-244.973	0.005	0.2	0.7
2021	Labile	0.63181	60-80	18.0947	0.005	0.2	0.7
2021	Stable	13.5565	60-80	-449.085	0.005	0.2	0.7
2021	Labile	7.58896	0-20	16.2436	0.005	0.2	0.5
2021	Stable	53.4479	0-20	-65.5564	0.005	0.2	0.5
2021	Labile	1.543	20-40	16.1731	0.005	0.2	0.5
2021	Stable	34.8758	20-40	-145.583	0.005	0.2	0.5
2021	Labile	0.758688	40-60	16.486	0.005	0.2	0.5
2021	Stable	21.881	40-60	-246.471	0.005	0.2	0.5
2021	Labile	0.632518	60-80	17.7952	0.005	0.2	0.5
2021	Stable	13.5129	60-80	-442.838	0.005	0.2	0.5
2021	Labile	7.58896	0-20	16.2443	0.005	0.3	1
2021	Stable	53.4479	0-20	-65.5564	0.005	0.3	1
2021	Labile	1.53019	20-40	16.8601	0.005	0.3	1
2021	Stable	34.7375	20-40	-145.642	0.005	0.3	1
2021	Labile	0.75333	40-60	17.6409	0.005	0.3	1
2021	Stable	22.0782	40-60	-249.779	0.005	0.3	1
2021	Labile	0.630453	60-80	18.6621	0.005	0.3	1
2021	Stable	13.6784	60-80	-428.802	0.005	0.3	1
2021	Labile	7.58896	0-20	16.244	0.005	0.3	0.7
2021	Stable	53.4479	0-20	-65.5564	0.005	0.3	0.7
2021	Labile	1.54172	20-40	16.2416	0.005	0.3	0.7
2021	Stable	34.877	20-40	-143.673	0.005	0.3	0.7
2021	Labile	0.759056	40-60	16.4221	0.005	0.3	0.7
2021	Stable	21.9445	40-60	-247.021	0.005	0.3	0.7
2021	Labile	0.632794	60-80	17.6785	0.005	0.3	0.7
2021	Stable	13.3109	60-80	-447.066	0.005	0.3	0.7
2021	Labile	7.58896	0-20	16.244	0.005	0.3	0.5
2021	Stable	53.4479	0-20	-65.5564	0.005	0.3	0.5
2021	Labile	1.54941	20-40	15.8346	0.005	0.3	0.5
2021	Stable	34.7438	20-40	-144.656	0.005	0.3	0.5
2021	Labile	0.762036	40-60	15.7839	0.005	0.3	0.5
2021	Stable	22.0551	40-60	-245.164	0.005	0.3	0.5
2021	Labile	0.633938	60-80	17.2105	0.005	0.3	0.5
2021	Stable	13.5476	60-80	-450.299	0.005	0.3	0.5
2021	Labile	7.58896	0-20	16.2413	0.01	0	1
2021	Stable	53.4479	0-20	-65.5565	0.01	0	1
2021	Labile	1.53019	20-40	17.6383	0.01	0	1
2021	Stable	34.7188	20-40	-144.503	0.01	0	1
2021	Labile	0.75333	40-60	20.0491	0.01	0	1
2021	Stable	22.1432	40-60	-247.543	0.01	0	1
2021	Labile	0.630453	60-80	25.1311	0.01	0	1
2021	Stable	13.2913	60-80	-446.266	0.01	0	1
2021	Labile	7.58896	0-20	16.2413	0.01	0.1	1
2021	Stable	53.4479	0-20	-65.5565	0.01	0.1	1
2021	Labile	1.53019	20-40	17.6383	0.01	0.1	1
2021	Stable	35.097	20-40	-143.337	0.01	0.1	1
2021	Labile	0.75333	40-60	20.0491	0.01	0.1	1
2021	Stable	21.9494	40-60	-250.514	0.01	0.1	1
2021	Labile	0.630453	60-80	25.1311	0.01	0.1	1
2021	Stable	13.7156	60-80	-450.1	0.01	0.1	1
2021	Labile	7.58896	0-20	16.2422	0.01	0.1	0.7
2021	Stable	53.4479	0-20	-65.5565	0.01	0.1	0.7
2021	Labile	1.53451	20-40	17.4042	0.01	0.1	0.7
2021	Stable	34.9799	20-40	-147.517	0.01	0.1	0.7
2021	Labile	0.755345	40-60	19.6027	0.01	0.1	0.7
2021	Stable	22.0491	40-60	-248.033	0.01	0.1	0.7
2021	Labile	0.631469	60-80	24.6925	0.01	0.1	0.7
2021	Stable	13.7515	60-80	-444.719	0.01	0.1	0.7
2021	Labile	7.58896	0-20	16.2409	0.01	0.1	0.5
2021	Stable	53.4479	0-20	-65.5565	0.01	0.1	0.5
2021	Labile	1.5374	20-40	17.2461	0.01	0.1	0.5
2021	Stable	34.8591	20-40	-147.816	0.01	0.1	0.5
2021	Labile	0.756565	40-60	19.3286	0.01	0.1	0.5
2021	Stable	21.933	40-60	-245.588	0.01	0.1	0.5
2021	Labile	0.632096	60-80	24.4249	0.01	0.1	0.5
2021	Stable	13.5359	60-80	-441.462	0.01	0.1	0.5
2021	Labile	7.58896	0-20	16.2413	0.01	0.2	1
2021	Stable	53.4479	0-20	-65.5565	0.01	0.2	1
2021	Labile	1.53019	20-40	17.6383	0.01	0.2	1
2021	Stable	34.8408	20-40	-143.003	0.01	0.2	1
2021	Labile	0.75333	40-60	20.0491	0.01	0.2	1
2021	Stable	22.0045	40-60	-247.723	0.01	0.2	1
2021	Labile	0.630453	60-80	25.1311	0.01	0.2	1
2021	Stable	13.6359	60-80	-447.852	0.01	0.2	1
2021	Labile	7.58896	0-20	16.2437	0.01	0.2	0.7
2021	Stable	53.4479	0-20	-65.5565	0.01	0.2	0.7
2021	Labile	1.53884	20-40	17.1713	0.01	0.2	0.7
2021	Stable	34.8791	20-40	-145.396	0.01	0.2	0.7
2021	Labile	0.757884	40-60	19.0551	0.01	0.2	0.7
2021	Stable	21.9534	40-60	-245.098	0.01	0.2	0.7
2021	Labile	0.632831	60-80	24.1164	0.01	0.2	0.7
2021	Stable	13.5735	60-80	-449.24	0.01	0.2	0.7
2021	Labile	7.58896	0-20	16.244	0.01	0.2	0.5
2021	Stable	53.4479	0-20	-65.5564	0.01	0.2	0.5
2021	Labile	1.5446	20-40	16.8618	0.01	0.2	0.5
2021	Stable	34.9023	20-40	-145.644	0.01	0.2	0.5
2021	Labile	0.760479	40-60	18.4909	0.01	0.2	0.5
2021	Stable	21.9222	40-60	-246.68	0.01	0.2	0.5
2021	Labile	0.634073	60-80	23.5789	0.01	0.2	0.5
2021	Stable	13.5413	60-80	-443.094	0.01	0.2	0.5
2021	Labile	7.58896	0-20	16.2413	0.01	0.3	1
2021	Stable	53.4479	0-20	-65.5565	0.01	0.3	1
2021	Labile	1.53019	20-40	17.6383	0.01	0.3	1
2021	Stable	34.7375	20-40	-145.652	0.01	0.3	1
2021	Labile	0.75333	40-60	20.0491	0.01	0.3	1
2021	Stable	22.0782	40-60	-249.801	0.01	0.3	1
2021	Labile	0.630453	60-80	25.1311	0.01	0.3	1
2021	Stable	13.6784	60-80	-428.823	0.01	0.3	1
2021	Labile	7.58896	0-20	16.244	0.01	0.3	0.7
2021	Stable	53.4479	0-20	-65.5564	0.01	0.3	0.7
2021	Labile	1.54316	20-40	16.939	0.01	0.3	0.7
2021	Stable	34.8941	20-40	-143.708	0.01	0.3	0.7
2021	Labile	0.760968	40-60	18.4045	0.01	0.3	0.7
2021	Stable	21.9736	40-60	-247.129	0.01	0.3	0.7
2021	Labile	0.634554	60-80	23.3709	0.01	0.3	0.7
2021	Stable	13.3322	60-80	-447.185	0.01	0.3	0.7
2021	Labile	7.58896	0-20	16.2432	0.01	0.3	0.5
2021	Stable	53.4479	0-20	-65.5564	0.01	0.3	0.5
2021	Labile	1.55181	20-40	16.477	0.01	0.3	0.5
2021	Stable	34.7776	20-40	-144.72	0.01	0.3	0.5
2021	Labile	0.76495	40-60	17.5432	0.01	0.3	0.5
2021	Stable	22.1125	40-60	-245.393	0.01	0.3	0.5
2021	Labile	0.636567	60-80	22.5304	0.01	0.3	0.5
2021	Stable	13.5893	60-80	-450.56	0.01	0.3	0.5

## Sheet: mean_age
Scenario	Depth	Pool	meanPoolAge	k1_reduction	vertical_transfer	vertical_partition
1	0-20	Stable	713.28	0	0	1
1	20-40	Stable	1472.12	0	0	1
1	40-60	Stable	2858.68	0	0	1
1	60-80	Stable	7144.39	0	0	1
2	0-20	Stable	713.28	0	0.1	1
2	20-40	Stable	1424.11	0	0.1	1
2	40-60	Stable	2821.2	0	0.1	1
2	60-80	Stable	6841.32	0	0.1	1
3	0-20	Stable	713.28	0	0.1	0.7
3	20-40	Stable	1478.83	0	0.1	0.7
3	40-60	Stable	2811.19	0	0.1	0.7
3	60-80	Stable	6830.37	0	0.1	0.7
4	0-20	Stable	713.28	0	0.1	0.5
4	20-40	Stable	1488.95	0	0.1	0.5
4	40-60	Stable	2788.82	0	0.1	0.5
4	60-80	Stable	6806.74	0	0.1	0.5
5	0-20	Stable	713.28	0	0.2	1
5	20-40	Stable	1391.76	0	0.2	1
5	40-60	Stable	2694.54	0	0.2	1
5	60-80	Stable	6336.42	0	0.2	1
6	0-20	Stable	713.28	0	0.2	0.7
6	20-40	Stable	1432.65	0	0.2	0.7
6	40-60	Stable	2708.57	0	0.2	0.7
6	60-80	Stable	6613.55	0	0.2	0.7
7	0-20	Stable	713.28	0	0.2	0.5
7	20-40	Stable	1447.12	0	0.2	0.5
7	40-60	Stable	2761.8	0	0.2	0.5
7	60-80	Stable	6632.53	0	0.2	0.5
8	0-20	Stable	713.28	0	0.3	1
8	20-40	Stable	1393.52	0	0.3	1
8	40-60	Stable	2641.99	0	0.3	1
8	60-80	Stable	5596.99	0	0.3	1
9	0-20	Stable	713.28	0	0.3	0.7
9	20-40	Stable	1395.58	0	0.3	0.7
9	40-60	Stable	2675.78	0	0.3	0.7
9	60-80	Stable	6256.78	0	0.3	0.7
10	0-20	Stable	713.28	0	0.3	0.5
10	20-40	Stable	1421.4	0	0.3	0.5
10	40-60	Stable	2700.95	0	0.3	0.5
10	60-80	Stable	6592.13	0	0.3	0.5
11	0-20	Stable	713.28	0.005	0	1
11	20-40	Stable	1472.3	0.005	0	1
11	40-60	Stable	2859.06	0.005	0	1
11	60-80	Stable	7145.05	0.005	0	1
12	0-20	Stable	713.28	0.005	0.1	1
12	20-40	Stable	1424.24	0.005	0.1	1
12	40-60	Stable	2821.51	0.005	0.1	1
12	60-80	Stable	6841.84	0.005	0.1	1
13	0-20	Stable	713.28	0.005	0.1	0.7
13	20-40	Stable	1479.08	0.005	0.1	0.7
13	40-60	Stable	2811.97	0.005	0.1	0.7
13	60-80	Stable	6831.68	0.005	0.1	0.7
14	0-20	Stable	713.28	0.005	0.1	0.5
14	20-40	Stable	1489.31	0.005	0.1	0.5
14	40-60	Stable	2789.96	0.005	0.1	0.5
14	60-80	Stable	6808.56	0.005	0.1	0.5
15	0-20	Stable	713.28	0.005	0.2	1
15	20-40	Stable	1391.85	0.005	0.2	1
15	40-60	Stable	2694.76	0.005	0.2	1
15	60-80	Stable	6336.75	0.005	0.2	1
16	0-20	Stable	713.28	0.005	0.2	0.7
16	20-40	Stable	1432.91	0.005	0.2	0.7
16	40-60	Stable	2709.47	0.005	0.2	0.7
16	60-80	Stable	6615.15	0.005	0.2	0.7
17	0-20	Stable	713.28	0.005	0.2	0.5
17	20-40	Stable	1447.56	0.005	0.2	0.5
17	40-60	Stable	2763.4	0.005	0.2	0.5
17	60-80	Stable	6635.34	0.005	0.2	0.5
18	0-20	Stable	713.28	0.005	0.3	1
18	20-40	Stable	1393.59	0.005	0.3	1
18	40-60	Stable	2642.13	0.005	0.3	1
18	60-80	Stable	5597.15	0.005	0.3	1
19	0-20	Stable	713.28	0.005	0.3	0.7
19	20-40	Stable	1395.81	0.005	0.3	0.7
19	40-60	Stable	2676.57	0.005	0.3	0.7
19	60-80	Stable	6258.08	0.005	0.3	0.7
20	0-20	Stable	713.28	0.005	0.3	0.5
20	20-40	Stable	1421.85	0.005	0.3	0.5
20	40-60	Stable	2702.69	0.005	0.3	0.5
20	60-80	Stable	6595.25	0.005	0.3	0.5
21	0-20	Stable	713.28	0.01	0	1
21	20-40	Stable	1472.51	0.01	0	1
21	40-60	Stable	2859.7	0.01	0	1
21	60-80	Stable	7146.7	0.01	0	1
22	0-20	Stable	713.28	0.01	0.1	1
22	20-40	Stable	1424.39	0.01	0.1	1
22	40-60	Stable	2822	0.01	0.1	1
22	60-80	Stable	6843.04	0.01	0.1	1
23	0-20	Stable	713.28	0.01	0.1	0.7
23	20-40	Stable	1479.39	0.01	0.1	0.7
23	40-60	Stable	2813.22	0.01	0.1	0.7
23	60-80	Stable	6834.56	0.01	0.1	0.7
24	0-20	Stable	713.28	0.01	0.1	0.5
24	20-40	Stable	1489.76	0.01	0.1	0.5
24	40-60	Stable	2791.82	0.01	0.1	0.5
24	60-80	Stable	6812.68	0.01	0.1	0.5
25	0-20	Stable	713.28	0.01	0.2	1
25	20-40	Stable	1391.97	0.01	0.2	1
25	40-60	Stable	2695.1	0.01	0.2	1
25	60-80	Stable	6337.44	0.01	0.2	1
26	0-20	Stable	713.28	0.01	0.2	0.7
26	20-40	Stable	1433.23	0.01	0.2	0.7
26	40-60	Stable	2710.89	0.01	0.2	0.7
26	60-80	Stable	6618.28	0.01	0.2	0.7
27	0-20	Stable	713.28	0.01	0.2	0.5
27	20-40	Stable	1448.1	0.01	0.2	0.5
27	40-60	Stable	2765.92	0.01	0.2	0.5
27	60-80	Stable	6641.09	0.01	0.2	0.5
28	0-20	Stable	713.28	0.01	0.3	1
28	20-40	Stable	1393.67	0.01	0.3	1
28	40-60	Stable	2642.34	0.01	0.3	1
28	60-80	Stable	5597.43	0.01	0.3	1
29	0-20	Stable	713.28	0.01	0.3	0.7
29	20-40	Stable	1396.1	0.01	0.3	0.7
29	40-60	Stable	2677.77	0.01	0.3	0.7
29	60-80	Stable	6260.34	0.01	0.3	0.7
30	0-20	Stable	713.28	0.01	0.3	0.5
30	20-40	Stable	1422.42	0.01	0.3	0.5
30	40-60	Stable	2705.39	0.01	0.3	0.5
30	60-80	Stable	6601.11	0.01	0.3	0.5

## Sheet: Transit_time
Scenario	transit_time	k1_reduction	vertical_transfer	vertical_partition
1	19.5982	0	0	1
2	19.6957	0	0.1	1
3	19.6918	0	0.1	0.7
4	19.6186	0	0.1	0.5
5	19.6581	0	0.2	1
6	19.6329	0	0.2	0.7
7	19.6164	0	0.2	0.5
8	19.6626	0	0.3	1
9	19.6026	0	0.3	0.7
10	19.6276	0	0.3	0.5
11	20.563	0.005	0	1
12	20.6654	0.005	0.1	1
13	20.6643	0.005	0.1	0.7
14	20.5895	0.005	0.1	0.5
15	20.6259	0.005	0.2	1
16	20.6051	0.005	0.2	0.7
17	20.592	0.005	0.2	0.5
18	20.6306	0.005	0.3	1
19	20.575	0.005	0.3	0.7
20	20.6077	0.005	0.3	0.5
21	21.6278	0.01	0	1
22	21.7355	0.01	0.1	1
23	21.7395	0.01	0.1	0.7
24	21.6644	0.01	0.1	0.5
25	21.694	0.01	0.2	1
26	21.6815	0.01	0.2	0.7
27	21.6748	0.01	0.2	0.5
28	21.6989	0.01	0.3	1
29	21.6522	0.01	0.3	0.7
30	21.6979	0.01	0.3	0.5

## Sheet: New_stable_SOC
Depth	k1_reduction	vertical_transfer	vertical_partition	prop	porcentaje
0-20	0	0	1	0.0781336	7.81336
0-20	0.005	0	1	0.0781336	7.81336
0-20	0.01	0	1	0.0781336	7.81336
20-40	0	0	1	0.0386116	3.86116
20-40	0.005	0	1	0.0385035	3.85035
20-40	0.01	0	1	0.0383675	3.83675
40-60	0	0	1	0.020064	2.0064
40-60	0.005	0	1	0.0199359	1.99359
40-60	0.01	0	1	0.0197199	1.97199
60-80	0	0	1	0.00807454	0.807454
60-80	0.005	0	1	0.00798534	0.798534
60-80	0.01	0	1	0.00775891	0.775891
0-20	0	0.1	0.5	0.0781336	7.81336
0-20	0	0.1	0.7	0.0781336	7.81336
0-20	0	0.1	1	0.0781336	7.81336
0-20	0.005	0.1	0.5	0.0781336	7.81336
0-20	0.005	0.1	0.7	0.0781336	7.81336
0-20	0.005	0.1	1	0.0781336	7.81336
0-20	0.01	0.1	0.5	0.0781336	7.81336
0-20	0.01	0.1	0.7	0.0781336	7.81336
0-20	0.01	0.1	1	0.0781336	7.81336
20-40	0	0.1	0.5	0.0351184	3.51184
20-40	0	0.1	0.7	0.0342479	3.42479
20-40	0	0.1	1	0.0342018	3.42018
20-40	0.005	0.1	0.5	0.035009	3.5009
20-40	0.005	0.1	0.7	0.0341466	3.41466
20-40	0.005	0.1	1	0.0341077	3.41077
20-40	0.01	0.1	0.5	0.0348715	3.48715
20-40	0.01	0.1	0.7	0.0340193	3.40193
20-40	0.01	0.1	1	0.0339894	3.39894
40-60	0	0.1	0.5	0.0190399	1.90399
40-60	0	0.1	0.7	0.0181807	1.81807
40-60	0	0.1	1	0.0167459	1.67459
40-60	0.005	0.1	0.5	0.0189074	1.89074
40-60	0.005	0.1	0.7	0.0180585	1.80585
40-60	0.005	0.1	1	0.0166394	1.66394
40-60	0.01	0.1	0.5	0.018685	1.8685
40-60	0.01	0.1	0.7	0.0178533	1.78533
40-60	0.01	0.1	1	0.0164599	1.64599
60-80	0	0.1	0.5	0.00740323	0.740323
60-80	0	0.1	0.7	0.00693317	0.693317
60-80	0	0.1	1	0.00617328	0.617328
60-80	0.005	0.1	0.5	0.007318	0.7318
60-80	0.005	0.1	0.7	0.00685456	0.685456
60-80	0.005	0.1	1	0.00610509	0.610509
60-80	0.01	0.1	0.5	0.00710304	0.710304
60-80	0.01	0.1	0.7	0.00665612	0.665612
60-80	0.01	0.1	1	0.00593236	0.593236
0-20	0	0.2	0.5	0.0781336	7.81336
0-20	0	0.2	0.7	0.0781336	7.81336
0-20	0	0.2	1	0.0781336	7.81336
0-20	0.005	0.2	0.5	0.0781336	7.81336
0-20	0.005	0.2	0.7	0.0781336	7.81336
0-20	0.005	0.2	1	0.0781336	7.81336
0-20	0.01	0.2	0.5	0.0781336	7.81336
0-20	0.01	0.2	0.7	0.0781336	7.81336
0-20	0.01	0.2	1	0.0781336	7.81336
20-40	0	0.2	0.5	0.0333268	3.33268
20-40	0	0.2	0.7	0.0315328	3.15328
20-40	0	0.2	1	0.0296554	2.96554
20-40	0.005	0.2	0.5	0.033216	3.3216
20-40	0.005	0.2	0.7	0.0314373	3.14373
20-40	0.005	0.2	1	0.0295757	2.95757
20-40	0.01	0.2	0.5	0.033077	3.3077
20-40	0.01	0.2	0.7	0.0313172	3.13172
20-40	0.01	0.2	1	0.0294754	2.94754
40-60	0	0.2	0.5	0.0173223	1.73223
40-60	0	0.2	0.7	0.0161527	1.61527
40-60	0	0.2	1	0.0132193	1.32193
40-60	0.005	0.2	0.5	0.0171923	1.71923
40-60	0.005	0.2	0.7	0.0160396	1.60396
40-60	0.005	0.2	1	0.0131355	1.31355
40-60	0.01	0.2	0.5	0.0169754	1.69754
40-60	0.01	0.2	0.7	0.0158505	1.58505
40-60	0.01	0.2	1	0.0129949	1.29949
60-80	0	0.2	0.5	0.00636462	0.636462
60-80	0	0.2	0.7	0.00512389	0.512389
60-80	0	0.2	1	0.00353309	0.353309
60-80	0.005	0.2	0.5	0.00628772	0.628772
60-80	0.005	0.2	0.7	0.00506397	0.506397
60-80	0.005	0.2	1	0.00349405	0.349405
60-80	0.01	0.2	0.5	0.00609633	0.609633
60-80	0.01	0.2	0.7	0.00491454	0.491454
60-80	0.01	0.2	1	0.00339567	0.339567
0-20	0	0.3	0.5	0.0781336	7.81336
0-20	0	0.3	0.7	0.0781336	7.81336
0-20	0	0.3	1	0.0781336	7.81336
0-20	0.005	0.3	0.5	0.0781336	7.81336
0-20	0.005	0.3	0.7	0.0781336	7.81336
0-20	0.005	0.3	1	0.0781336	7.81336
0-20	0.01	0.3	0.5	0.0781336	7.81336
0-20	0.01	0.3	0.7	0.0781336	7.81336
0-20	0.01	0.3	1	0.0781336	7.81336
20-40	0	0.3	0.5	0.0312098	3.12098
20-40	0	0.3	0.7	0.0288787	2.88787
20-40	0	0.3	1	0.0240157	2.40157
20-40	0.005	0.3	0.5	0.0311021	3.11021
20-40	0.005	0.3	0.7	0.0287908	2.87908
20-40	0.005	0.3	1	0.0239532	2.39532
20-40	0.01	0.3	0.5	0.030967	3.0967
20-40	0.01	0.3	0.7	0.0286804	2.86804
20-40	0.01	0.3	1	0.0238746	2.38746
40-60	0	0.3	0.5	0.0157056	1.57056
40-60	0	0.3	0.7	0.0128879	1.28879
40-60	0	0.3	1	0.00854559	0.854559
40-60	0.005	0.3	0.5	0.0155807	1.55807
40-60	0.005	0.3	0.7	0.0127957	1.27957
40-60	0.005	0.3	1	0.00849182	0.849182
40-60	0.01	0.3	0.5	0.015374	1.5374
40-60	0.01	0.3	0.7	0.0126424	1.26424
40-60	0.01	0.3	1	0.00840189	0.840189
60-80	0	0.3	0.5	0.00478352	0.478352
60-80	0	0.3	0.7	0.00309236	0.309236
60-80	0	0.3	1	0.000936765	0.0936765
60-80	0.005	0.3	0.5	0.00472293	0.472293
60-80	0.005	0.3	0.7	0.00305542	0.305542
60-80	0.005	0.3	1	0.00092635	0.092635
60-80	0.01	0.3	0.5	0.00457489	0.457489
60-80	0.01	0.3	0.7	0.00296466	0.296466
60-80	0.01	0.3	1	0.000900765	0.0900765
